# Supplementary material
Source: MDPI journal article supplement (https://www.mdpi.com/2304-6740/8/11/59)
Supplement: s1 [file s1]

# Supplementary Materials: Toward Overcoming the Challenges in the Comparison of Different Pd Nanocatalysts: Case Study of the Ethanol Oxidation Reaction

Oliver Asger Hjortshøj Schreyer, Jonathan Quinson and María Escudero-Escribano

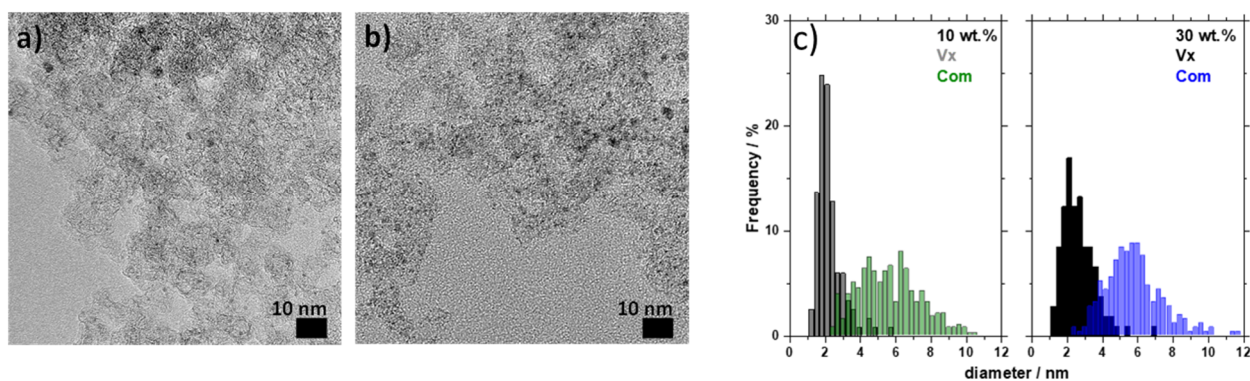

**Figure S1.** (a,b) TEM micrographs from Figure 1a,b reported for clarity for Pd/Vx (a) 10 wt.% and (b) 30 wt.%. (c) Size distribution obtained from TEM analysis of different Pd NPs on carbon support with different loading as indicated. 'Vx' stands for Vulcan and refers to the home-made material and 'Com' to the commercially available materials.

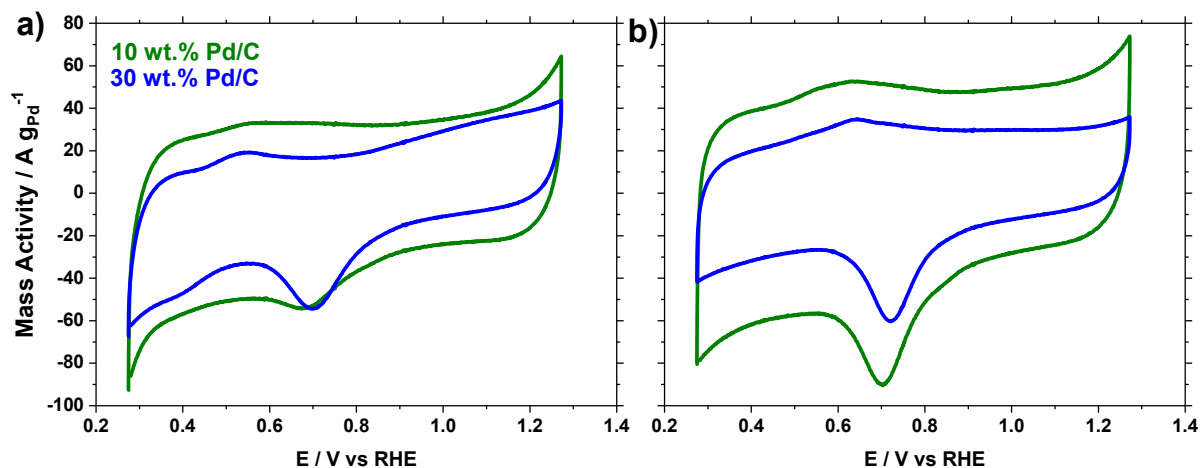

**Figure S2.** Cyclic voltammograms of the Pd/C with different loading as indicated for ECSA determination in 1 M KOH. The scan rate during CV measurements was 50 mV.s<sup>-1</sup>. Argon was purged in electrolyte during all measurements performed in 1 M KOH without rotation of the electrode.

The ECSA was estimated by converting the charge related to the reduction peak around 0.7 V *vs.* RHE. The capacitance can be related to the 'distance' between the featureless part of the cyclic voltammograms (e.g. at 1.0 V *vs.* RHE).

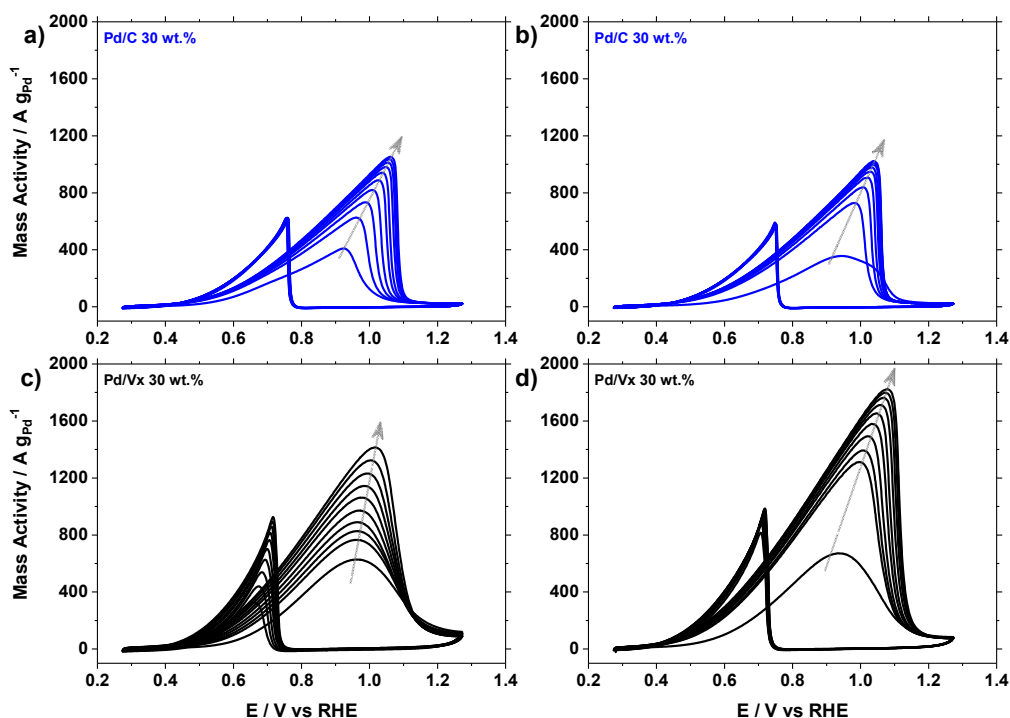

**Figure S3.** Example of 1st to 10th cyclic voltammograms of (a,b) commercial 30 wt.% Pd/C (a) before and (b) after CA, (c,d) home-made 30 wt.% Pd/Vx (c) before and (d) after CA at 0.71 V *vs.* RHE. The scan rate during CV measurements was 50 mV.s<sup>-1</sup>. Argon was purged in electrolyte during all measurements performed in 1 M ethanol in 1 M KOH without rotation of the electrode.

**Table S1.** Samples used for averaged electrochemical values reported.

| Nominal mass of Pd on the electrode in $\mu\text{g}$<br>$\mu\text{L}$ Nafion at 1 % used for the ink preparation - 'A' indicates that 10 $\mu\text{L}$ acid was used<br>in the ink composition |    |      |    |    |    |      |      |      |      |      |      |    |
|------------------------------------------------------------------------------------------------------------------------------------------------------------------------------------------------|----|------|----|----|----|------|------|------|------|------|------|----|
| Sample                                                                                                                                                                                         | 1  | 2    | 3  | 4  | 5  | 6    | 7    | 8    | 9    | 10   | 11   | 12 |
| 10 wt.%<br>Pd/C                                                                                                                                                                                | 10 | 3.33 | 10 | 10 | 10 | 3.33 | 3.33 | 3.33 | 10   | -    | -    | -  |
| 30 wt.%<br>Pd/C                                                                                                                                                                                | 10 | 3.33 | 10 | 10 | 10 | 3.33 | 3.33 | 10   | 10   | 3.33 | -    | -  |
| 10 wt.%<br>Pd/Vx                                                                                                                                                                               | 10 | 3.33 | 10 | 10 | 10 | 3.33 | 3.33 | 3.33 | 3.33 | 3.33 | 3.33 | -  |
| 30 wt.%<br>Pd/Vx                                                                                                                                                                               | 10 | 3.33 | 10 | 10 | 10 | 3.33 | 3.33 | 10   | 10   | 3.33 | 10   | 10 |

Across the literature various 'ink' composition are used and there is therefore no 'standard' way to prepare the related samples: different mass of catalysts of Pd used, different loading, different ink composition, different electrolytes [1–7].

The average electrochemical values reported in Table 1, once average to the identical ink preparation in grey in Table S1 are given in Table S2.

**Table S2.** Equivalent of Table 1 considering only the samples in grey in Table S1.

| wt. %                                                 | Commercial      |                 | Synthesized     |                  |
|-------------------------------------------------------|-----------------|-----------------|-----------------|------------------|
|                                                       | 10              | 30              | 10              | 30               |
| MA after 60 minutes CA / $\text{A}\cdot\text{g}^{-1}$ | $30.3 \pm 12.3$ | $62.1 \pm 23.2$ | $73.1 \pm 44.9$ | $114.0 \pm 22.6$ |
| ECSA before EOR / $\text{m}^2\cdot\text{g}^{-1}$      | $8.1 \pm 3.2$   | $17.6 \pm 7.7$  | $36.4 \pm 27.8$ | $63.3 \pm 26.5$  |
| ECSA after EOR / $\text{m}^2\cdot\text{g}^{-1}$       | $20.4 \pm 6.4$  | $21.0 \pm 7.4$  | $22.8 \pm 14.6$ | $36.8 \pm 8.8$   |
| SA after EOR / $\text{A}\cdot\text{m}^{-2}$           | $1.7 \pm 0.9$   | $3.0 \pm 1.1$   | $3.8 \pm 1.9$   | $3.2 \pm 0.9$    |

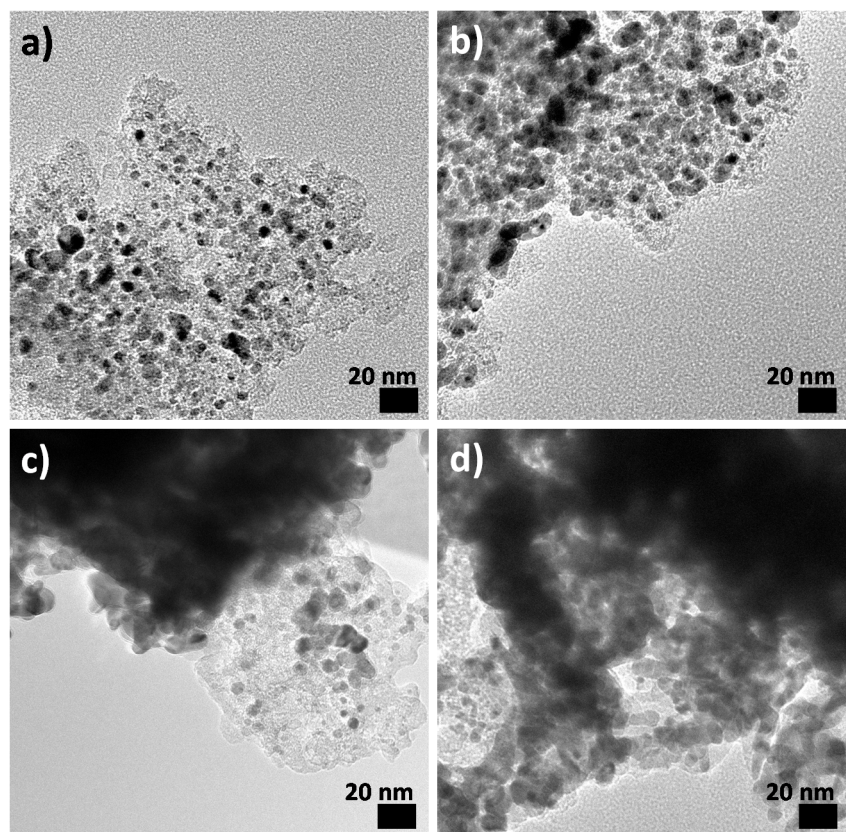

**Figure S4.** TEM micrographs of commercial Pd/C (a,b) before and (c,d) after electrochemical treatment for commercial samples with (a,c) 10 wt.% and (b,d) 30 wt.%.

Both samples before and after electrochemical treatment show large agglomeration of the Pd. This seems to be more pronounced after electrochemistry. TEM allows to screen only a finite number of spots and NPs but indicates that most of the smaller NPs well identified in Figure S4a,b disappeared after electrochemical testing.

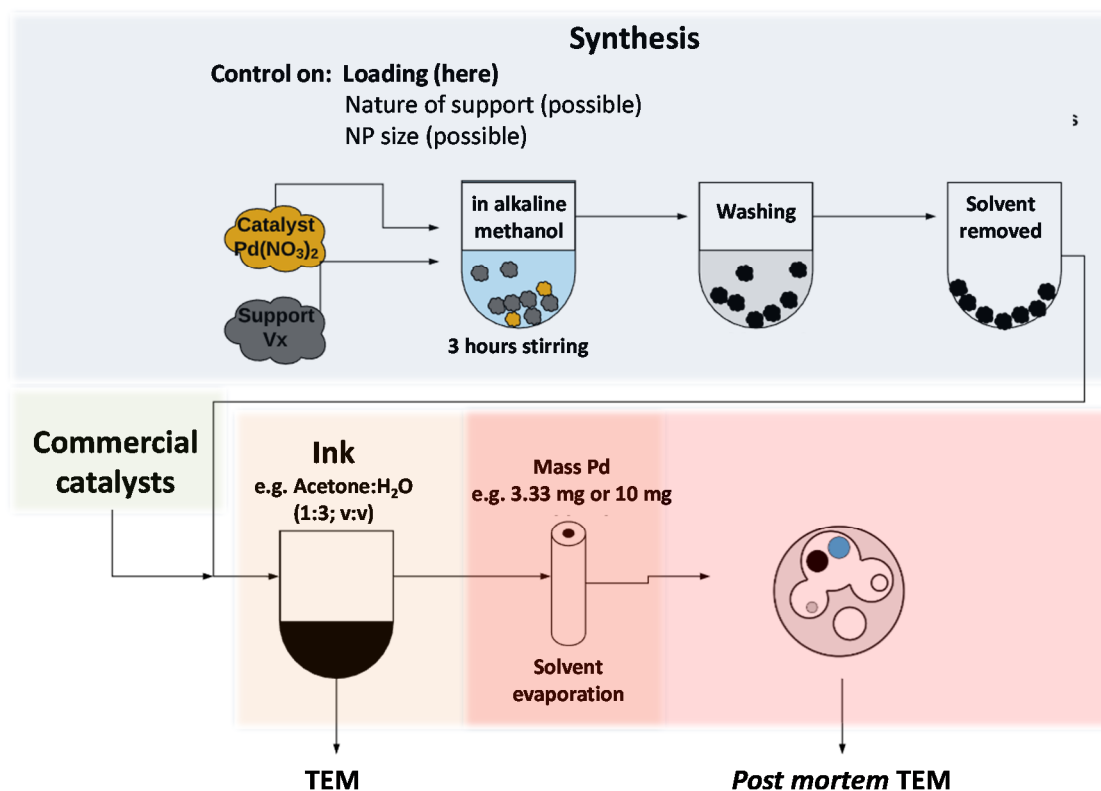

**Figure S5.** Work flow for catalyst synthesis, electrochemical evaluation and post mortem characterization.

## References

- 1 Chen, Y. J. *et al.* Monodisperse ordered indium-palladium nanoparticles: synthesis and role of indium for boosting superior electrocatalytic activity for ethanol oxidation reaction. *Nanoscale* **11**, 3336–3343, doi:10.1039/c8nr07342b (2019).
- 2 Yao, C. X. *et al.* Palladium Nanoparticles encapsulated into hollow N-doped graphene microspheres as electrocatalyst for ethanol oxidation reaction. *ACS Applied Nano Materials* **2**, 1898–1908, doi:10.1021/acsnm.8b02294 (2019).
- 3 Monyoncho, E. A. *et al.* Ethanol electro-oxidation on palladium revisited using polarization modulation infrared reflection absorption spectroscopy (PM-IRRAS) and density functional theory (DFT): Why is it difficult to break the C–C bond? *ACS Catalysis* **6**, 4894–4906, doi:10.1021/acscatal.6b00289 (2016).
- 4 Perez, J., Paganin, V. A. & Antolini, E. Particle size effect for ethanol electro-oxidation on Pt/C catalysts in half-cell and in a single direct ethanol fuel cell. *Journal of Electroanalytical Chemistry* **654**, 108–115, doi:10.1016/j.jelechem.2011.01.013 (2011).
- 5 Ma, N. *et al.* Carrageenan assisted synthesis of palladium nanoflowers and their electrocatalytic activity toward ethanol. *ACS Sustainable Chemistry & Engineering* **6**, 1133–1140, doi:10.1021/acssuschemeng.7b03425 (2018).
- 6 An, L., Zhao, T. S. & Li, Y. S. Carbon-neutral sustainable energy technology: Direct ethanol fuel cells. *Renewable & Sustainable Energy Reviews* **50**, 1462–1468, doi:10.1016/j.rser.2015.05.074 (2015).
- 7 Quinson, J., Simonsen, S. B., Kuhn, L. T., Kunz, S. & Arenz, M. Size effect studies in catalysis: a simple surfactant-free synthesis of sub 3 nm Pd nanocatalysts supported on carbon. *RS Advances* **8**, 33794–33797, doi:10.1039/c8ra06912c (2018).
